# Supplementary material for: Discovery of 8-prenylnaringenin from hop (Humulus lupulusL.) as a potent monoacylglycerol lipase inhibitor for treatments of neuroinflammation and Alzheimer's disease
Source: Royal Society of Chemistry journal article supplement (doi:10.1039/d1ra05311f), 2021-01-01
Supplement: d1ra05311f1.pdf [file d1ra05311f1.pdf]

| ID | MW                     | LibDock score | Structure                                                                                                                                                                 |
|----|------------------------|---------------|---------------------------------------------------------------------------------------------------------------------------------------------------------------------------|
| 1  | ZINC49543276<br>460.53 | 140.45        | 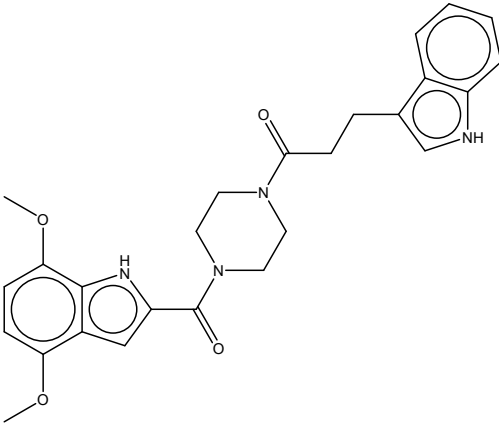<br><chem>COC1ccc(c2c1cc([nH]2)C(=O)N3CCN(CC3)C(=O)CCc4c[nH]c5c4cccc5)OC</chem>         |
| 2  | ZINC12901322<br>426.42 | 138.88        | <br><chem>COC1cccc(c1)C(=O)C[C@@H](c2cc(=O)oc3c2ccc(c3OC)OC)C(=O)OC</chem>              |
| 3  | ZINC02094363<br>491.56 | 138.31        | <br><chem>Cc1ccc(cc1)S(=O)(=O)N[C@H](C)C(=O)Oc2ccc3c(c(c(=O)oc3c2)Cc4cccc4)C</chem>   |
| 4  | ZINC02121301<br>479.57 | 138.25        | <br><chem>COc1cc2ccnc(c2cc1OC)Cc3cc(c(cc3NC(=O)NC4CCCC4)OC)OC</chem>                  |
| 5  | ZINC26756321<br>447.62 | 137.98        | <br><chem>CSCC[C@@H](c1[nH]c2cccc2n1)NC(=O)CCCC[C@H]3[C@@H]4[C@H](CS3)NC(=O)N4</chem> |

|   |              |        |        |                                                                                                                                                                                              |
|---|--------------|--------|--------|----------------------------------------------------------------------------------------------------------------------------------------------------------------------------------------------|
| 6 | ZINC12296264 | 496.64 | 137.83 | 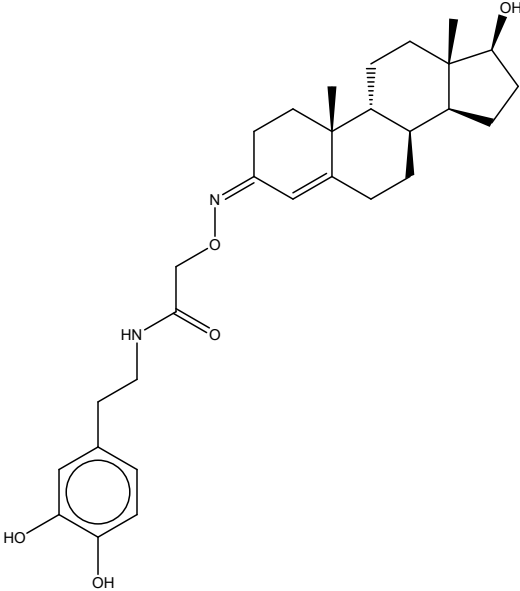<br><chem>C[C@]12CC[C@@H]3[C@@H]([C@@H]1CC[C@@H]2O)CCC4=C/C(=N\OCC(=O)NCC5=C(O)C(O)C=C5</chem>              |
| 7 | ZINC12873908 | 477.55 | 136.66 | <br><chem>CCCCc1cc(=O)oc2c1ccc(c2C)OC(=O)C3CCN(CC3)C(=O)OCc4ccccc4</chem>                                 |
| 8 | ZINC59485813 | 474.63 | 135.85 | <br><chem>CC(C)[C@H](C(=O)[O-])NC(=O)CO/N=C\1/CC[C@@]2([C@H]3CC[C@]4([C@H]([C@@H]3CCC2=C1)CC[C@]4</chem> |
| 9 | NP-1         | 416.00 | 135.77 |                                                                                                          |

|    |              |        |        |                                                                                                                                                                          |
|----|--------------|--------|--------|--------------------------------------------------------------------------------------------------------------------------------------------------------------------------|
|    |              |        |        | <chem>[C]1=[C]C2=C(C(=C1[O]))C[C]=C([C])[C]CCC3=C(C(=[C]C(=C23)[O])O[C])CC4=[C][C]=C([C])</chem>                                                                         |
| 10 | ZINC96222257 | 355.39 | 133.92 | 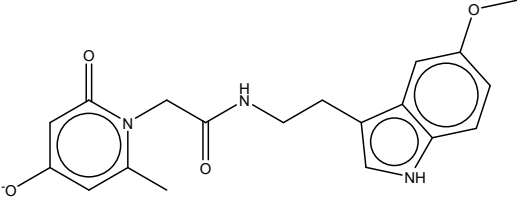<br><chem>Cc1cc(cc(=O)n1CC(=O)NCCc2c[nH]c3c2cc(cc3)OC)[O-]</chem>                      |
| 11 | ZINC02101063 | 424.49 | 131.52 | <br><chem>CCCCCc1cc2c(cc1OCc3ccc(o3)C(=O)OC)oc(=O)c4c2CCCC4</chem>                     |
| 12 | ZINC08762195 | 498.65 | 131.30 | <br><chem>CC(=O)[C@H]1CC[C@@H]2[C@@]1(CC[C@H]3[C@@H]2CCCC4=C/C(=N\OCC(=O)N5</chem>   |
| 13 | ZINC35361841 | 492.67 | 131.02 | <br><chem>C[C@]12CC[C@H]3[C@H]1([C@@H]1CC[C@@H]2O)CCC4=C/C(=N/OCC(=O)N[C@@H]3</chem> |
| 14 | ZINC20412582 | 361.39 | 130.35 | <br><chem>CC1=C(C)C(=O)OC1=C(O)C=C1C(=O)NCCCCCCCC(=O)[O-]</chem>                     |

|    |              |        |        |                                                                                                                                                                                    |
|----|--------------|--------|--------|------------------------------------------------------------------------------------------------------------------------------------------------------------------------------------|
|    |              |        |        | <chem>Cc1cc(c2c(c(c(=O)oc2c1)CC(=O)NCCCCC(=O)[O-])C)O</chem>                                                                                                                       |
| 15 | ZINC02094002 | 415.46 | 130.14 | 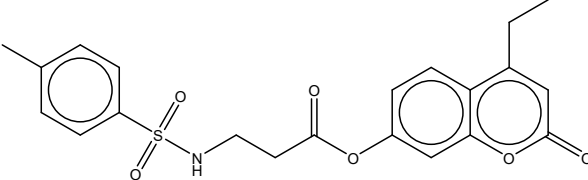<br><chem>CCc1cc(=O)oc2c1ccc(c2)OC(=O)CCNS(=O)(=O)c3ccc(cc3)C</chem>                             |
| 16 | ZINC59415123 | 492.65 | 129.84 | <br><chem>C[C@]12CC[C@@H]3[C@@H]([C@@H]1CC[C@]2(C)O)CCC4=C/C(=N\OCC(=O)NCCC5=CC=C(O)C=C5</chem> |
| 17 | ZINC06623971 | 413.46 | 129.51 | <br><chem>Cc1c2cc3c(cc2oc(=O)c1CC(=O)N4CCC(CC4)C(=O)[O-])OC(CC3)(C)C</chem>                    |
| 18 | ZINC04073787 | 385.46 | 128.97 | <br><chem>CC(C)[C@@H](C(=O)N1CCC(CC1)C(=O)NCC(=O)[O-])NC(=O)OC(C)(C)C</chem>                   |

|    |              |        |        |                                                                                                                                                                                  |
|----|--------------|--------|--------|----------------------------------------------------------------------------------------------------------------------------------------------------------------------------------|
| 19 | ZINC08764707 | 481.58 | 128.80 | 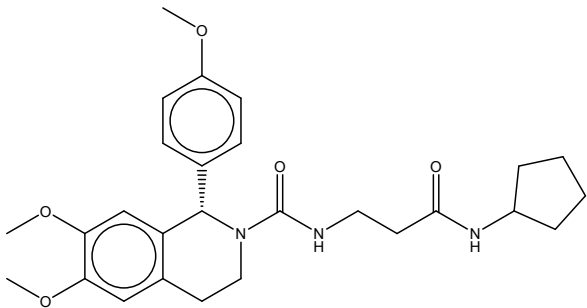<br><chem>COc1ccc(cc1)[C@H]2c3cc(c(cc3CCN2C(=O)NCCC(=O)NC4CCCC4)OC)OC</chem>                    |
| 20 | ZINC49543643 | 380.35 | 128.27 | <br><chem>COc1ccc(cc1NC(=O)[C@H]2CC(=Nc3n2c4cccc4n3)[O-])C(=O)[O-]</chem>                      |
| 21 | ZINC04085479 | 405.44 | 127.68 | <br><chem>Cc1coc2c1cc3c(c(c(=O)oc3c2C)CC(=O)NC[C@@H](c4cccc4)O)C</chem>                       |
| 22 | ZINC02092891 | 382.36 | 126.87 | <br><chem>Cc1c2ccc(cc2oc(=O)c1CCC(=O)[O-])OCc3ccc(cc3)C(=O)[O-]</chem>                       |
| 23 | ZINC40312482 | 433.67 | 126.83 | <br><chem>C[C@H](CCC(=O)NC(C)C)[C@H]1CC[C@@H]2[C@@]1(CC[C@H]3[C@H]2[C@H](C[C@H]3O)O)O</chem> |

|    |              |        |        |                                                                                                                                                                              |
|----|--------------|--------|--------|------------------------------------------------------------------------------------------------------------------------------------------------------------------------------|
| 24 | ZINC02093059 | 408.49 | 126.29 | 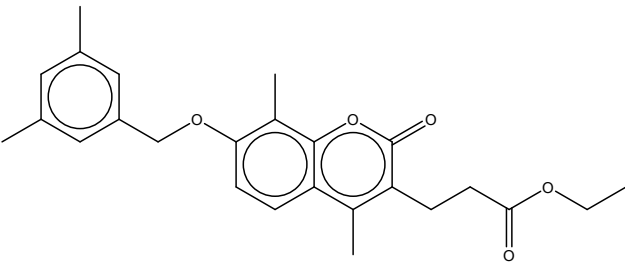<br><chem>CCOC(=O)CCc1c(c2ccc(c(c2oc1=O)C)OCc3cc(cc(c3)C)C)C</chem>                         |
| 25 | ZINC02092648 | 423.46 | 126.28 | <br><chem>Cc1c2ccc(cc2oc(=O)c1Cc3ccccc3)OC(=O)CNC(=O)OC(C)(C)C</chem>                      |
| 26 | ZINC02094317 | 463.48 | 125.95 | <br><chem>Cc1c2ccc(cc2oc(=O)c1CC(=O)OC)OCC(=O)c3c(n(c4c3cc(cc4)OC)C)C</chem>               |
| 27 | ZINC02096011 | 368.34 | 125.93 | <br><chem>Cc1c2ccc(cc2oc(=O)c1CC(=O)[O-])OCc3ccc(cc3)C(=O)[O-]</chem>                    |
| 28 | ZINC12296255 | 451.60 | 125.76 | <br><chem>C[C@]12CC[C@H]3[C@H]([C@@H]1CC[C@@H]2O)CCC4=C/C(=N\OCC(=O)NCc5ccncc5)C4</chem> |

|    |              |               |               |                                                                                                                                                                                                    |
|----|--------------|---------------|---------------|----------------------------------------------------------------------------------------------------------------------------------------------------------------------------------------------------|
| 29 | ZINC01448097 | 355.34        | 125.18        | 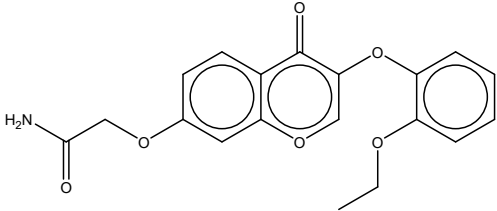<br><chem>CCOC1CCCC1Oc2coc3cc(ccc3c2=O)OCC(=O)N</chem>                                                            |
| 30 | ZINC12875652 | 488.66        | 125.18        | <br><chem>CC[C@H](C)[C@H](C(=O)[O-])NC(=O)CO/N=C/1\CC[C@@]2([C@H]3CC[C@]4([C@H]([C@@H]3CCC2=C1)CC[C@]4</chem>    |
| 31 | ZINC02150470 | 437.49        | 125.14        | <br><chem>Cc1c2ccc(cc2oc(=O)c1Cc3ccccc3)OC(=O)CCNC(=O)OC(C)(C)C</chem>                                           |
| 32 | <b>NP-5</b>  | <b>420.46</b> | <b>125.10</b> | <br><chem>C14=C(C2=C(C(=C1C[C]=C([C])[C])[O])C(C(=[C]O2)C3=[C]C(=C([C]=[C]3)[O])[O])=O)[C]=</chem>              |
| 33 | ZINC01131730 | 460.48        | 123.96        | <br><chem>CCOC(=O)[C@H](c1ccccc1)Oc2ccc3c(c2)oc(c3=O)Oc4ccccc4OC</chem>                                        |
| 34 | ZINC12875671 | 488.66        | 123.92        | <br><chem>CC[C@H](C)[C@@H](C(=O)[O-])NC(=O)CO/N=C/1\CC[C@@]2([C@H]3CC[C@]4([C@H]([C@@H]3CCC2=C1)CC[C@]4</chem> |

|    |              |        |        |                                                                                      |                                                                                                            |
|----|--------------|--------|--------|--------------------------------------------------------------------------------------|------------------------------------------------------------------------------------------------------------|
| 35 | ZINC02148147 | 436.54 | 123.88 | 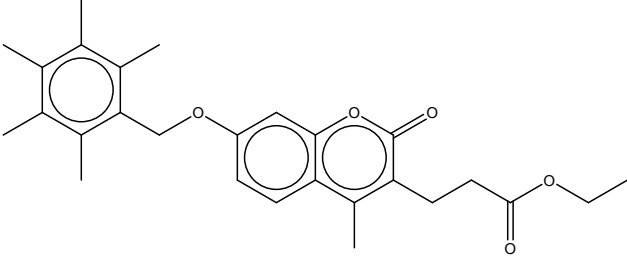    | <chem>CCOC(=O)CCc1c(c2ccc(cc2oc1=O)OCc3c(c(c(c3C)C)C)C)C</chem>                                            |
| 36 | ZINC00622142 | 400.42 | 123.74 |    | <chem>Cc1c2ccc(cc2oc(=O)c1Cc3ccccc3)OCc4ccc(cc4)C(=O)[O-]</chem>                                           |
| 37 | ZINC85893818 | 492.67 | 123.44 |   | <chem>C[C@]12CC[C@@H]3[C@@H]([C@@H]1CC[C@@H]2O)CCC4=C/C(=N\OCC(=O)N[C@</chem>                              |
| 38 | ZINC59415104 | 474.63 | 123.42 |  | <chem>CC[C@H](C)[C@@H](C(=O)[O-])NC(=O)CO/N=C\1/CC[C@@]2([C@@H]3CC[C@]4([C@@H]([C@@H]3CCC2=C1)CC[C@</chem> |



|    |              |        |        |                                                                                                                                                                                                 |
|----|--------------|--------|--------|-------------------------------------------------------------------------------------------------------------------------------------------------------------------------------------------------|
| 39 | ZINC02091914 | 465.54 | 122.84 | 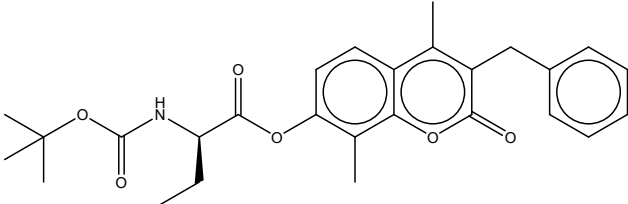<br><chem>CC[C@H](C(=O)Oc1ccc2c(c(c(=O)oc2c1C)Cc3ccccc3)C)NC(=O)OC(C)(C)C</chem>                               |
| 40 | ZINC12875660 | 488.66 | 122.58 | <br><chem>CC[C@H](C)[C@H](C(=O)[O-])NC(=O)CO/N=C/1\CC[C@@]2([C@H]3CC[C@]4([C@H]([C@@H]3CCC2=C1)CC[C@]4</chem> |
| 41 | ZINC02106989 | 390.39 | 122.37 | <br><chem>Cc1c(ccc2c1oc(=O)c3c2ccc(c3)OC)OCc4ccc(cc4)C(=O)[O-]</chem>                                        |
| 42 | ZINC12880584 | 474.63 | 122.32 | <br><chem>CC(C)[C@H](C(=O)[O-])NC(=O)CO/N=C/1\CC[C@@]2([C@H]3CC[C@]4([C@H]([C@@H]3CCC2=C1)CC[C@]4</chem>    |
| 43 | ZINC11865796 | 450.44 | 121.49 | <br><chem>C[C@]12CC[C@H]3c4ccc(cc4CC[C@H]3[C@@H]1CCC2=O)OCc5c(c(c(c5F)F)F)F</chem>                          |

|    |              |        |        |                                                                                                                                                                         |
|----|--------------|--------|--------|-------------------------------------------------------------------------------------------------------------------------------------------------------------------------|
| 44 | ZINC98363691 | 385.37 | 121.00 | 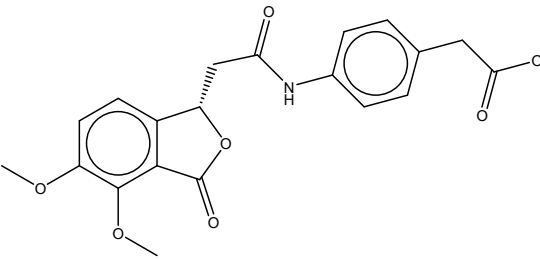<br><chem>COc1ccc2c(c1OC)C(=O)O[C@H]2CC(=O)Nc3ccc(cc3)CC(=O)[O-]</chem>                |
| 45 | ZINC70672029 | 444.69 | 119.66 | <br><chem>CCCCCCCCC(=O)O[C@@H]1CC[C@]2([C@H](C1)CC[C@H]3[C@@H]2CC[C@]4([C@</chem>     |
| 46 | ZINC08877509 | 459.49 | 119.40 | <br><chem>Cc1cc2c(c(c(=O)o2)CC(=O)N3CCC(CC3)C(=O)[O-])C)c4c1c(co4)c5ccccc5</chem>     |
| 47 | ZINC02024602 | 346.42 | 119.34 | <br><chem>CCCCCc1cc2c(c(c(=O)oc2cc1O)CC(=O)OCC)C</chem>                             |
| 48 | ZINC04026743 | 400.55 | 119.23 | <br><chem>CCOC(=O)N/N=C/C)\C1=CC[C@@H]2[C@@]1(CC[C@H]3[C@@H]2CC=C4[C@@]3(C</chem>   |
| 49 | ZINC72332867 | 484.75 | 118.03 | <br><chem>CC(=C)[C@@H]1CC[C@]2([C@H]1[C@H]3CC[C@H]4[C@]5(CC[C@@H](C)[C@@H]5C</chem> |

|    |              |        |        |                                                                                                                                                                        |
|----|--------------|--------|--------|------------------------------------------------------------------------------------------------------------------------------------------------------------------------|
| 50 | NP-3         | 300.00 | 117.86 | 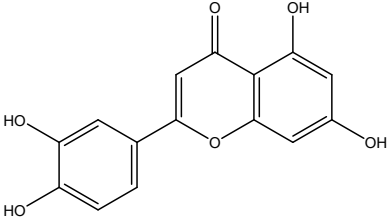<br><chem>C12=C(C=C(C=C1O)O)OC(=CC2=O)C3=CC=C(C(=C3)O)O</chem>                        |
| 51 | ZINC04025798 | 384.43 | 117.76 | <br><chem>CC(=O)N[C@H]1CCc2cc(c(c2-c3c1cc(=O)c(cc3)N)OC)OC)OC</chem>                 |
| 52 | ZINC00134437 | 338.35 | 117.53 | <br><chem>CCCc1cc(=O)oc2c1ccc(c2)OCc3ccc(cc3)C(=O)[O-]</chem>                       |
| 53 | ZINC04029576 | 441.65 | 117.19 | <br><chem>CC(=O)C1=CC[C@H]2[C@@]1(CC[C@@H]3[C@@H]2CC[C@@H]4[C@@]3(CC[C@@H]4</chem> |
| 54 | ZINC04073978 | 412.69 | 116.65 | <br><chem>CC[C@H](CC[C@@H](C)[C@H]1CC[C@H]2[C@@]1(CC[C@H]3[C@H]2CC=C4[C@@]3</chem> |

|    |              |        |        |                                                                                                                                                                            |
|----|--------------|--------|--------|----------------------------------------------------------------------------------------------------------------------------------------------------------------------------|
| 55 | ZINC08762798 | 450.44 | 116.44 | 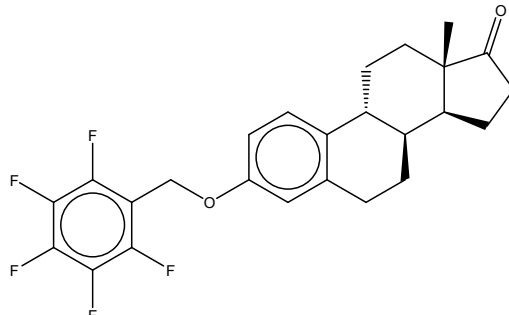<br><chem>C[C@]12CC[C@H]3c4ccc(cc4CC[C@@H]3[C@@H]1CCC2=O)OCc5c(c(c(c5F)F)F)F)F</chem>     |
| 56 | ZINC36370056 | 342.34 | 116.24 | <br><chem>CCCCc1cc(=O)oc2c1ccc(c2)OCc3ccc(o3)C(=O)[O-]</chem>                            |
| 57 | ZINC04027828 | 396.49 | 115.01 | <br><chem>C[C@]12CC[C@H]3c4ccc(cc4CC[C@@H]3[C@@H]1C[C@H]([C@@H]2O)O)OCc5ccc(c5)F</chem> |
| 58 | NP-2         | 354.00 | 114.95 | <br><chem>C12=C(C(=C(C=C1O)O)CC=C(C)C)OC(=CC2=O)C3=CC=C(C=C3)O</chem>                  |
| 59 | ZINC32123860 | 387.43 | 114.74 | <br><chem>Cc1c(c(on1)C)CCC(=O)Nc2c3c(c(c4c2OCO4)OC)C[NH+](CC3)C</chem>                 |

|    |              |        |        |                                                                                                                                                                         |
|----|--------------|--------|--------|-------------------------------------------------------------------------------------------------------------------------------------------------------------------------|
| 60 | ZINC02116063 | 375.42 | 114.72 | 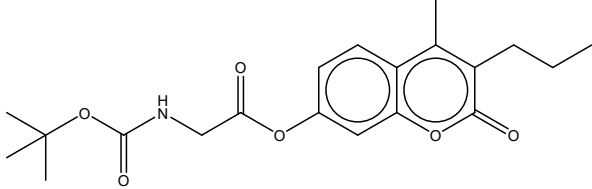<br><chem>CCCC1c(c2ccc(cc2oc1=O)OC(=O)CNC(=O)OC(C)(C)C)C</chem>                        |
| 61 | ZINC11865797 | 450.44 | 114.72 | <br><chem>C[C@]12CC[C@@H]3c4ccc(cc4CC[C@H]3[C@@H]1CCC2=O)OCc5c(c(c(c5F)F)F)F</chem>   |
| 62 | ZINC08762795 | 450.44 | 114.55 | <br><chem>C[C@]12CC[C@@H]3c4ccc(cc4CC[C@H]3[C@@H]1CCC2=O)OCc5c(c(c(c5F)F)F)F</chem>  |
| 63 | ZINC04028098 | 409.56 | 113.72 | <br><chem>C[C@]12CC[C@H]3c4ccc(cc4CC[C@H]3[C@@H]1CCC2=O)OC(=O)CC[NH+]5CCCC5</chem>  |
| 64 | ZINC04082584 | 388.58 | 113.71 | <br><chem>CCCCCC(=O)O[C@H]1CC[C@]2([C@H](C1)CC[C@@H]3[C@@H]2CC[C@]4([C@H]3CC</chem> |

|    |              |        |        |                                                                                                                                                                                          |
|----|--------------|--------|--------|------------------------------------------------------------------------------------------------------------------------------------------------------------------------------------------|
| 65 | ZINC04027829 | 396.49 | 113.61 | 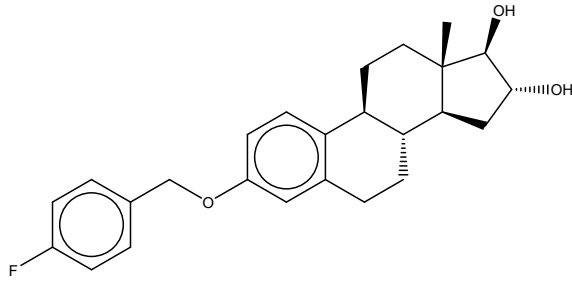<br><chem>C[C@]12CC[C@@H]3c4ccc(cc4CC[C@H]3[C@@H]1C[C@H]([C@@H]2O)O)OCc5ccc(F)cc5</chem>                |
| 66 | ZINC70692132 | 446.58 | 113.34 | <br><chem>C[C@@H]1C[C@H]2[C@@H]3C[C@H]4[C@@]5(O4)C[C@H](CC[C@@]5([C@H]3CC[C@@H]2)OC(=O)C</chem>        |
| 67 | ZINC04073977 | 412.69 | 113.08 | <br><chem>CC[C@H](CC[C@@H](C)[C@H]1CC[C@@H]2[C@@]1(CC[C@H]3[C@H]2CC=C4[C@@H]3CC[C@@H](C4)C=O)C</chem> |
| 68 | ZINC00318706 | 328.32 | 113.07 | <br><chem>CCCc1cc(=O)oc2c1ccc(c2)OCc3ccc(o3)C(=O)[O-]</chem>                                         |
| 69 | ZINC03881345 | 376.49 | 112.83 | <br><chem>C[C@]12CC[C@@H]3c4ccc(cc4CC[C@H]3[C@@H]1CC[C@@H]2O)OC(=O)c5ccccc5</chem>                   |

|    |              |        |        |                                                                                                                                                                                                  |
|----|--------------|--------|--------|--------------------------------------------------------------------------------------------------------------------------------------------------------------------------------------------------|
| 70 | ZINC04028163 | 378.48 | 112.75 | 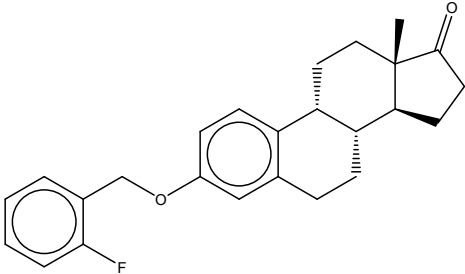<br><chem>C[C@]12CC[C@H]3c4ccc(cc4CC[C@H]3[C@@H]1CCC2=O)OCc5ccccc5F</chem>                                      |
| 71 | ZINC96222598 | 357.36 | 112.48 | <br><chem>COc1cc2c(cc1OC)C=CN(C(=O)C2)Cc3ccc(oc3)C(=O)OC</chem>                                                |
| 72 | ZINC04027827 | 396.49 | 111.80 | <br><chem>C[C@]12CC[C@@H]3c4ccc(cc4CC[C@H]3[C@@H]1C[C@H]([C@@H]2O)O)OCc5ccccc5F</chem>                        |
| 73 | ZINC04742397 | 442.67 | 111.32 | <br><chem>C[C@H](CCCC(C)C)[C@H]1CC[C@@H]2[C@@]1(CC[C@H]3[C@H]2C(=O)C=C4[C@@]3(CC[C@@H](C4)OC(=O)C)C)C</chem> |
| 74 | ZINC04028161 | 378.48 | 111.02 | <br><chem>C[C@]12CC[C@H]3c4ccc(cc4CC[C@@H]3[C@@H]1CCC2=O)OCc5ccccc5F</chem>                                  |

|    |              |        |        |                                                                                                                                                                       |
|----|--------------|--------|--------|-----------------------------------------------------------------------------------------------------------------------------------------------------------------------|
| 75 | ZINC02126451 | 364.43 | 110.97 | 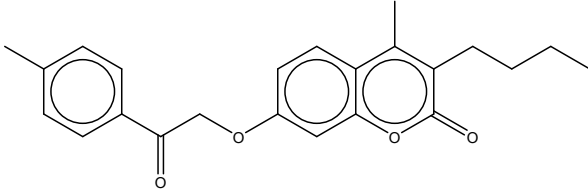<br><chem>CCCC1c(c2ccc(cc2oc1=O)OCC(=O)c3ccc(cc3)C)C</chem>                          |
| 76 | NP-4         | 286.24 | 110.93 | <br><chem>C2(C1=C(C=C(C=C1OC=C2C3=CC(=C(C=C3)O)O)O)O)=O</chem>                      |
| 77 | ZINC02101690 | 446.45 | 110.81 | <br><chem>Cc1c(c(=O)c2ccc(cc2o1)OCC(=O)c3ccc(cc3)OC)Oc4ccccc4OC</chem>              |
| 78 | ZINC04029153 | 419.55 | 110.71 | <br><chem>C/C(=N/O)/[C@@]1[[C@@H]](C[C@@H]2[C@@]1(CC[C@@H]3[C@@H]2CC=C4[C@@</chem> |
| 79 | ZINC38570148 | 379.84 | 110.42 | <br><chem>C[C@@H](C(=O)N[C@@H](C(C)C)C(=O)[O-])NC(=O)c1cc2cc(ccc2n1C)Cl</chem>    |
| 80 | ZINC04028162 | 378.48 | 109.92 | <br><chem>C[C@]12CC[C@@H]3c4ccc(cc4CC[C@H]3[C@@H]1CCC2=O)OCc5ccccc5F</chem>       |



|    |              |        |        |                                                                                                                                                                          |
|----|--------------|--------|--------|--------------------------------------------------------------------------------------------------------------------------------------------------------------------------|
| 81 | ZINC01128691 | 430.45 | 109.22 | 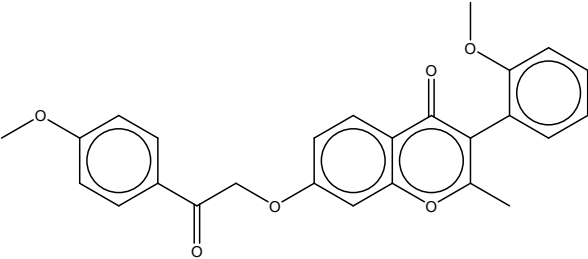<br><chem>Cc1c(c(=O)c2ccc(cc2o1)OCC(=O)c3ccc(cc3)OC)c4ccccc4OC</chem>                   |
| 82 | ZINC00487708 | 302.32 | 108.94 | <br><chem>COc1cc(ccc1OCc2ccc(cc2)C(=O)OC)CO</chem>                                     |
| 83 | ZINC70691728 | 404.54 | 107.85 | <br><chem>C[C@@H]1C[C@H]2[C@@H]3CC=C4C[C@H](CC[C@@]4([C@H]3CC[C@@]2)[C@]1(C)C</chem>   |
| 84 | ZINC02091432 | 366.36 | 107.08 | <br><chem>COc1cccc1c2coc3cc(ccc3c2=O)OCC(=O)OCC=C</chem>                             |
| 85 | ZINC04082367 | 386.57 | 106.55 | <br><chem>C[C@@H]1C[C@H]2[C@@H]3CC=C4C[C@H](CC[C@@]4([C@H]3CC[C@@]2)[C@]1(C)C</chem> |
| 86 | ZINC03900801 | 350.41 | 105.67 | <br><chem>CCCCc1c2ccc(cc2oc(=O)c1c3ccccc3)OC(=O)C</chem>                             |

|    |              |        |        |                                                                                                                                                                         |
|----|--------------|--------|--------|-------------------------------------------------------------------------------------------------------------------------------------------------------------------------|
| 87 | ZINC04083344 | 386.57 | 103.92 | 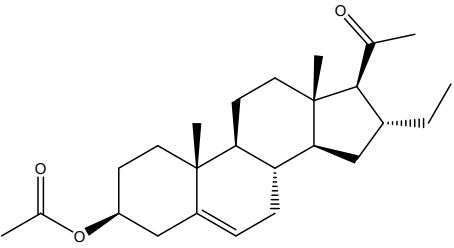<br><chem>CC[C@@H]1C[C@H]2[C@@H]3CC=C4C[C@H](CC[C@@]4([C@H]3CC[C@@]2([C@H]1</chem>     |
| 88 | ZINC03870057 | 278.43 | 101.17 | <br><chem>CC/C=C/C/C=C/C/C=C/C/CCCCCCCC(=O)[O-]</chem>                                |
| 89 | ZINC04074056 | 370.53 | 101.06 | <br><chem>CC1=C([C@]2(CC[C@H]3[C@H]([C@H]2C1)CC=C4[C@@]3(CC[C@@H](C4)OC(=O)C)C</chem> |
| 90 | ZINC04090035 | 272.38 | 100.62 | <br><chem>CCCC[C@@H](CC)CNC(=O)N[C@@H](C(C)C)C(=O)[O-]</chem>                        |
| 91 | ZINC04025842 | 391.30 | 97.97  | <br><chem>CC(=O)Oc1ccc2c(c1)CC[C@@H]3[C@@H]2CC[C@]4([C@@H]3[C@H](C4=O)Br)C</chem>   |
| 92 | ZINC03882022 | 391.30 | 97.10  | <br><chem>CC(=O)Oc1ccc2c(c1)CC[C@@H]3[C@H]2CC[C@]4([C@@H]3[C@H](C4=O)Br)C</chem>    |
| 93 | ZINC04340204 | 323.34 | 95.44  | <br><chem>Cc1c2ccc(cc2oc(=O)c1c3ccccc3)OC(=O)N(C)C</chem>                           |

|    |              |        |       |                                                                                                                                                                       |
|----|--------------|--------|-------|-----------------------------------------------------------------------------------------------------------------------------------------------------------------------|
| 94 | ZINC04025021 | 322.87 | 95.19 | 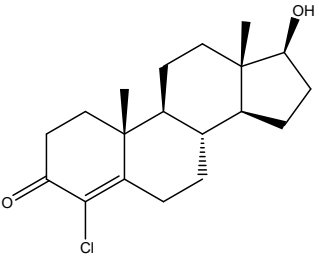<br><chem>C[C@]12CC[C@H]3[C@H]([C@@H]1CC[C@@H]2O)CCC4=C(C(=O)CC[C@]34C)Cl</chem>      |
| 95 | NP-7         | 296.00 | 95.04 | <br><chem>C2CC(C1=[C][C]=C3C(=C1C2)C(C(C4=C3CO[C]4[C])=O)=O)([C])[C]</chem>          |
| 96 | ZINC00518722 | 274.36 | 93.92 | <br><chem>CC1=CC[C@@]2(C[C@H]1[C@@H](OC2)c3ccc(cc3)OC)CO</chem>                     |
| 97 | NP-6         | 266.33 | 93.08 | <br><chem>C1(=CC(=CC=C1O)CC=C)C2=CC(=CC=C2O)CC=C</chem>                           |
| 98 | ZINC04029196 | 308.89 | 87.98 | <br><chem>C[C@]12CC[C@H](C[C@@H]1CC[C@H]3[C@H]2CC[C@]4([C@@H]3CCC4=O)C)Cl</chem>   |
| 99 | ZINC04026561 | 332.54 | 85.36 | <br><chem>C[C@@H]1C[C@]2([C@H](CC[C@@H]3[C@@H]2CC[C@]4([C@@H]3CCC4=O)C)C[C@</chem> |

|     |              |        |       |                                                                                                                                                             |
|-----|--------------|--------|-------|-------------------------------------------------------------------------------------------------------------------------------------------------------------|
| 100 | ZINC04028163 | 378.48 | 71.27 | 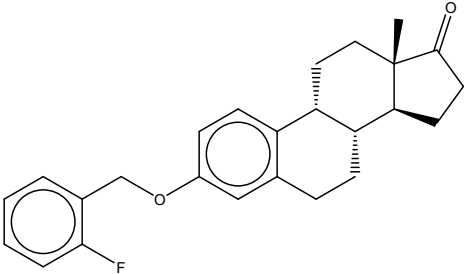<br><chem>C[C@]12CC[C@H]3c4ccc(cc4CC[C@H]3[C@@H]1CCC2=O)OCc5ccccc5F</chem> |
|-----|--------------|--------|-------|-------------------------------------------------------------------------------------------------------------------------------------------------------------|
