# Supplementary material for: Discovery of 8-prenylnaringenin from hop (Humulus lupulusL.) as a potent monoacylglycerol lipase inhibitor for treatments of neuroinflammation and Alzheimer's disease
Source: Royal Society of Chemistry journal article supplement (doi:10.1039/d1ra05311f), 2021-01-01
Supplement: d1ra05311f2.pdf [file d1ra05311f2.pdf]

**Discovery of 8-Prenylnaringenin from Hop (*Humulus lupulus L.*) as a potent Monoacylglycerol Lipase Inhibitor for Treatments of Neuroinflammation and Alzheimer's Disease**

**Min-Che Tung <sup>a#</sup>, Kit-Man Fung <sup>b#</sup>, His-Mie Hsu <sup>c</sup> and Tien-Sheng Tseng<sup>c\*</sup>**

<sup>a</sup>Division of Urology, Department of Surgery, Tungs' Taichung MetroHarbor Hospital, Taichung 435, Taiwan

<sup>b</sup>Institute of Biological Chemistry, Academia Sinica, Taipei 115, Taiwan.

<sup>c</sup>Institute of Molecular Biology, National Chung Hsing University, Taichung, Taiwan.

<sup>#</sup>These authors contributed equally to this work.

**\* Correspondence:**

Tien-Sheng Tseng  
emersontseng@dragon.nchu.edu.tw

## Supporting information

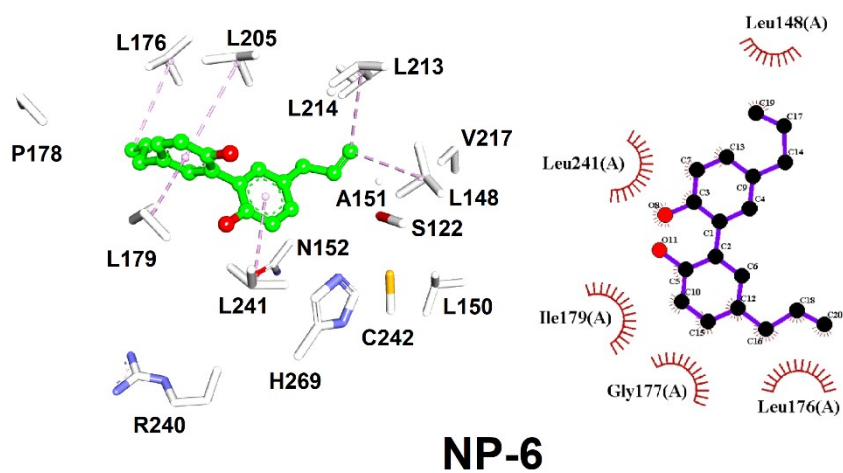

**Fig. S1 The molecular interactions of hMAGL-NP-6.** (The inhibitor was shown in ball-and-sticks (green); the active site residues were presented as white sticks. The dash lines indicate hydrogen-bond (green) and hydrophobic interactions (light-pink).)

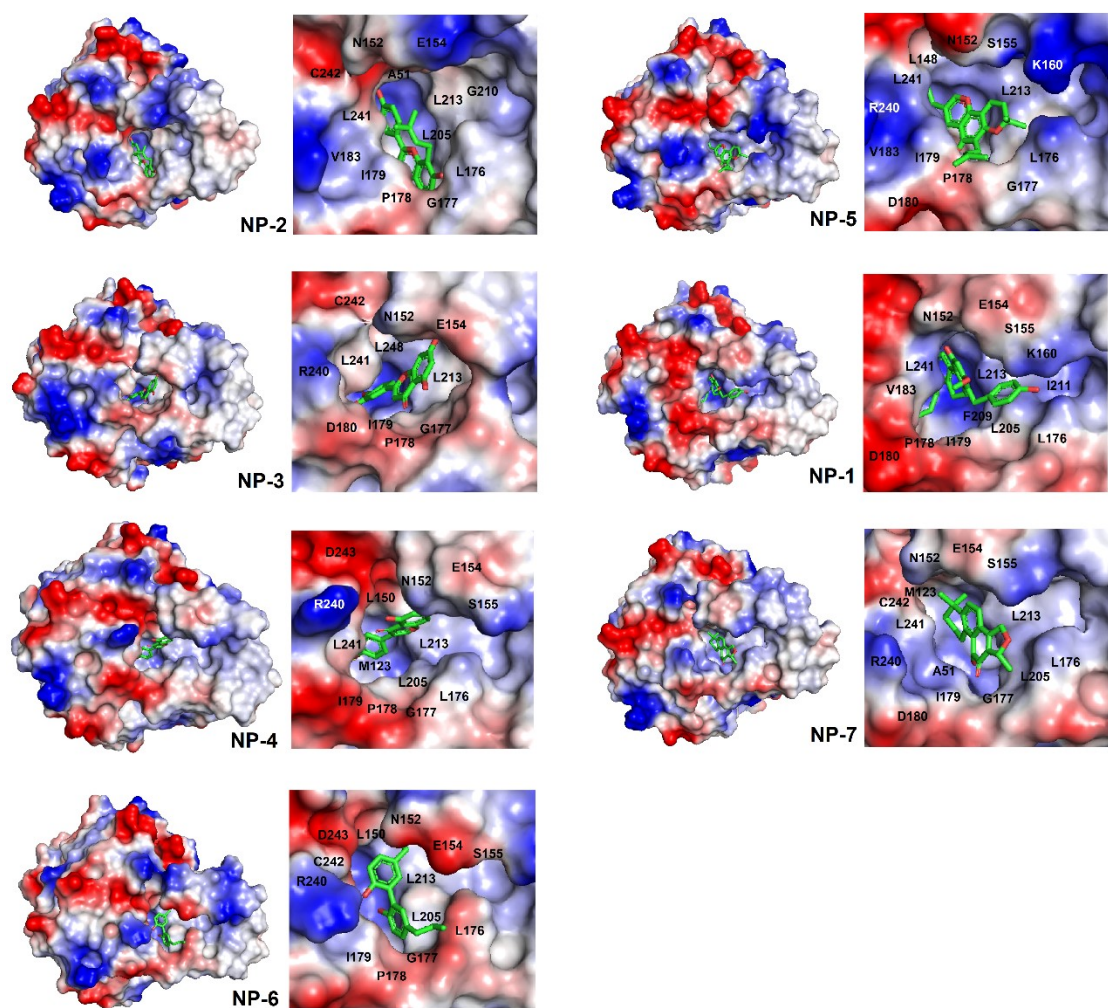

**Figure S2. The orientations of the identified inhibitors in the active site of hMAGL.** The structure of hMAGL is presented as electrostatic surface potential map and the inhibitors are shown in sticks (green). The active site residues which surround the inhibitors are labeled. The figure was made by using PyMOL2.3.4. (<http://www.pymol.org>).

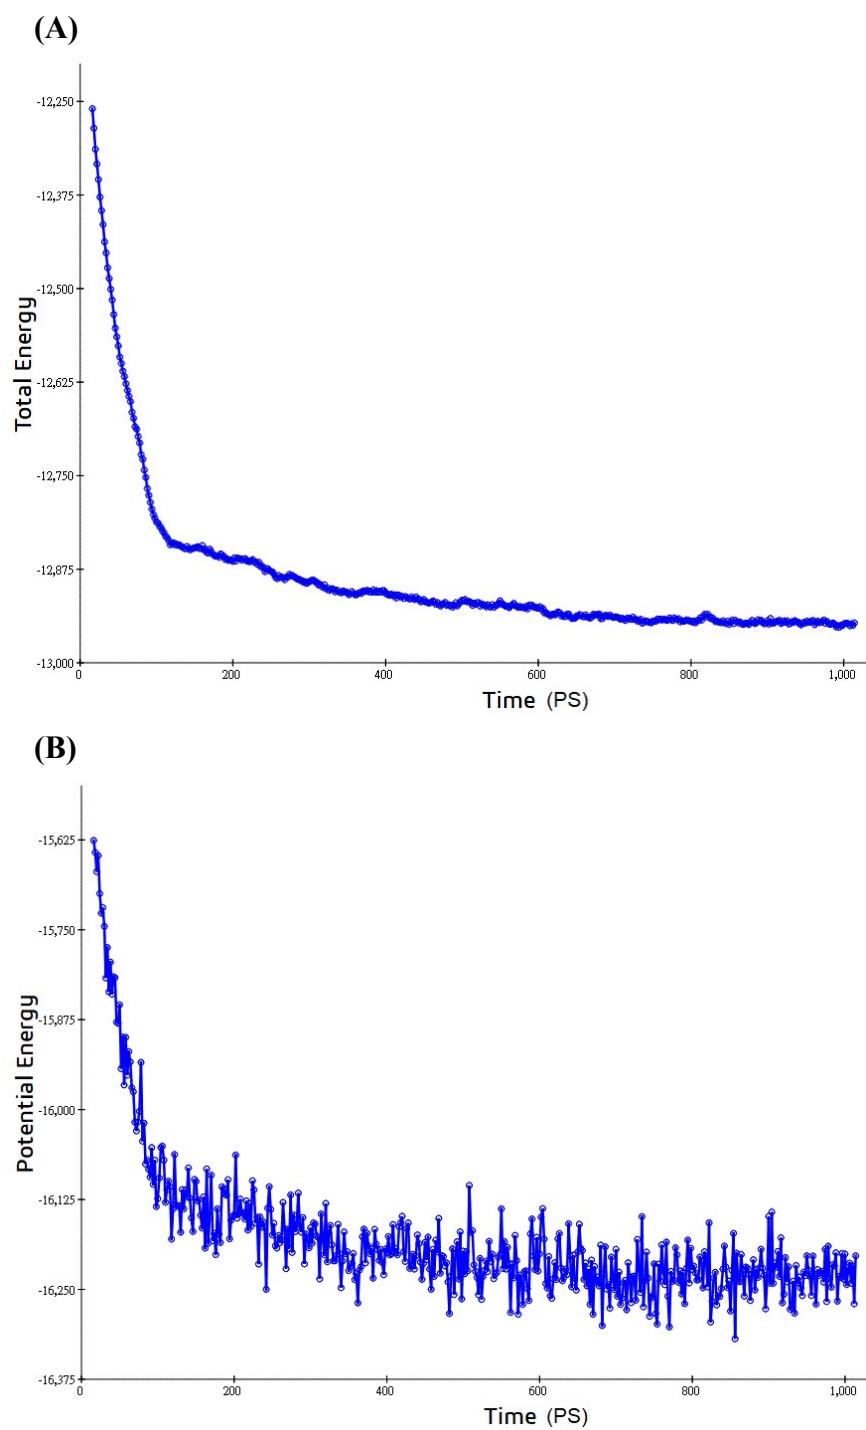

**Figure S3. The molecular dynamics simulations of hMAGL-NP-1 complex.**

(A) The total energy as a function of time. (B) The potential energy as a function of time.

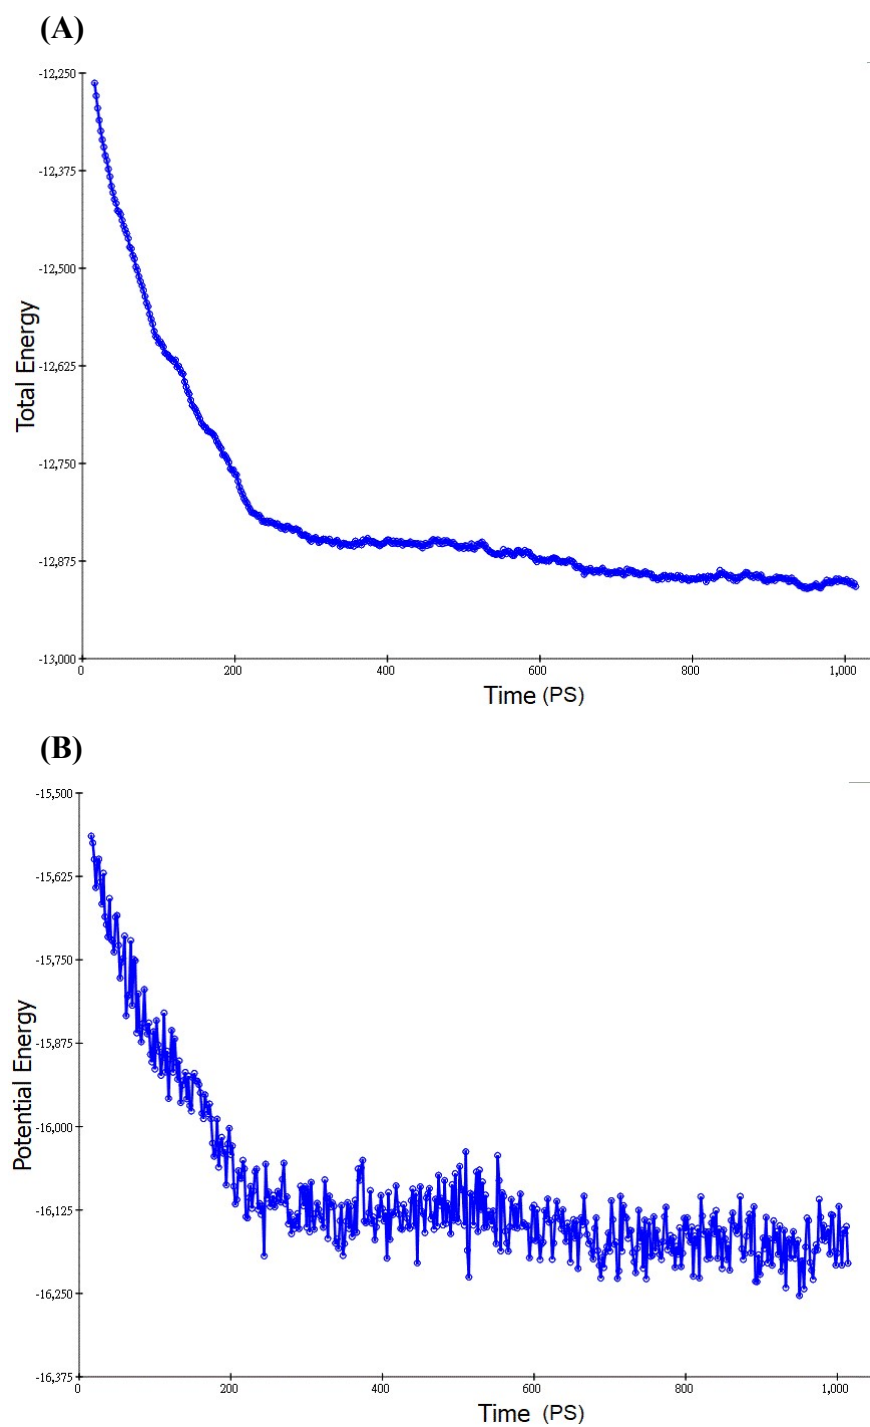

**Figure S4. The molecular dynamics simulations of hMAGL-NP-2 complex.**

(A) The total energy as a function of time. (B) The potential energy as a function of time.

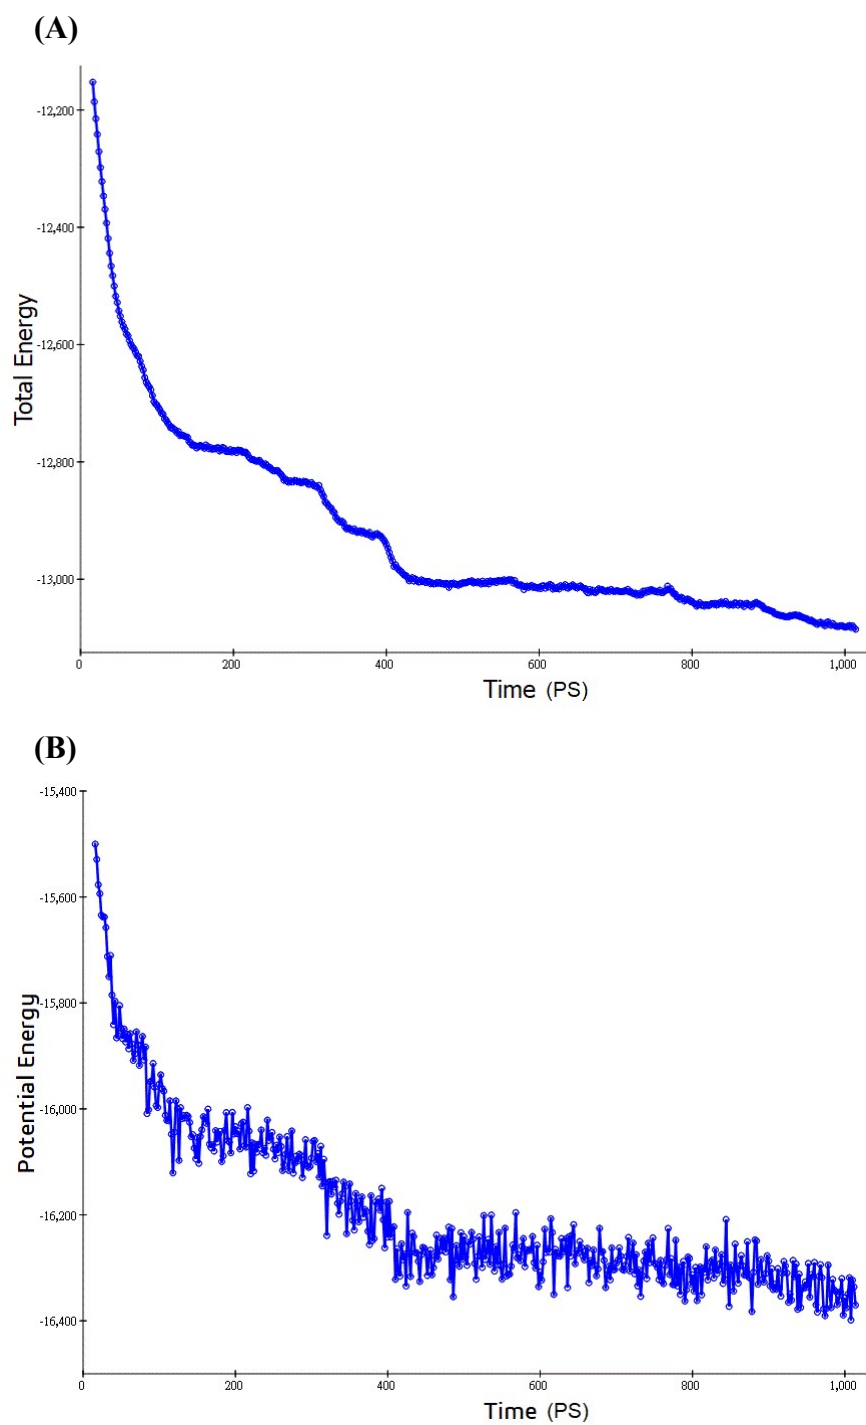

**Figure S5. The molecular dynamics simulations of hMAGL-NP-3 complex.**

(A) The total energy as a function of time. (B) The potential energy as a function of time.

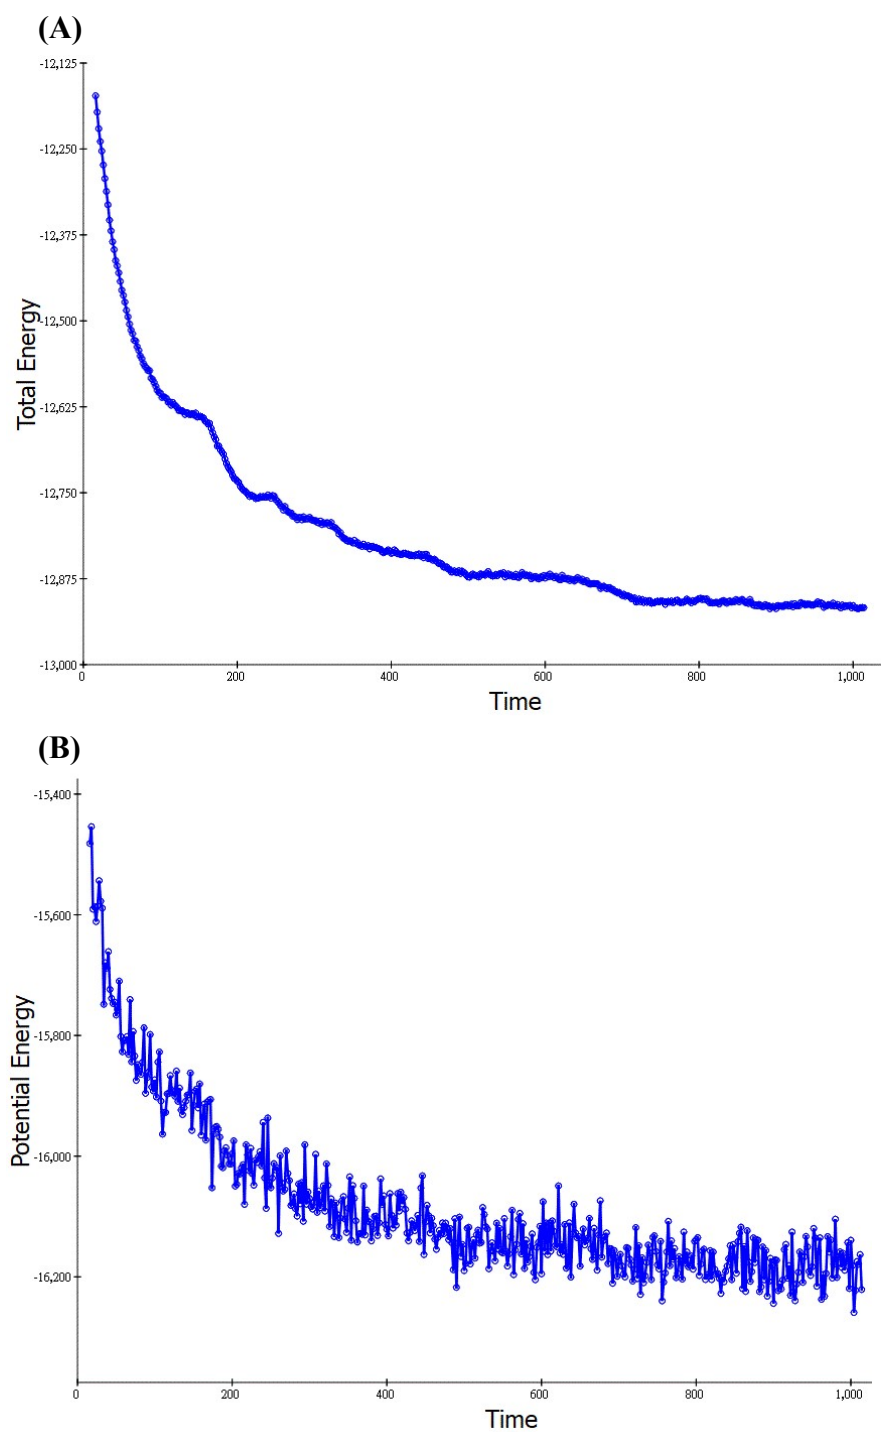

**Figure S6. The molecular dynamics simulations of hMAGL-NP-4 complex.**

(A) The total energy as a function of time. (B) The potential energy as a function of time.

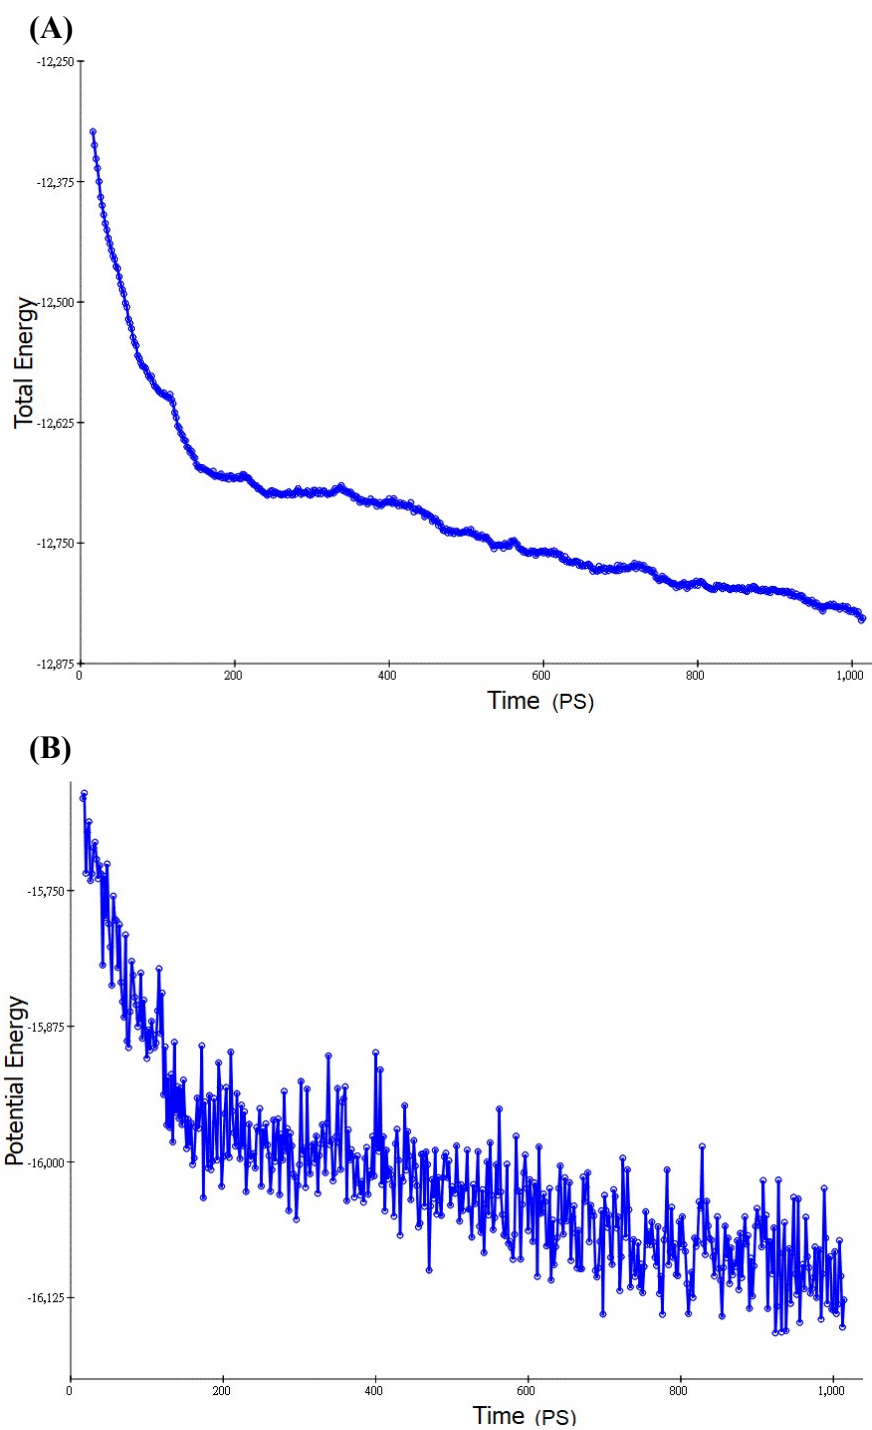

**Figure S7. The molecular dynamics simulations of hMAGL-NP-5 complex.**

(A) The total energy as a function of time. (B) The potential energy as a function of time.



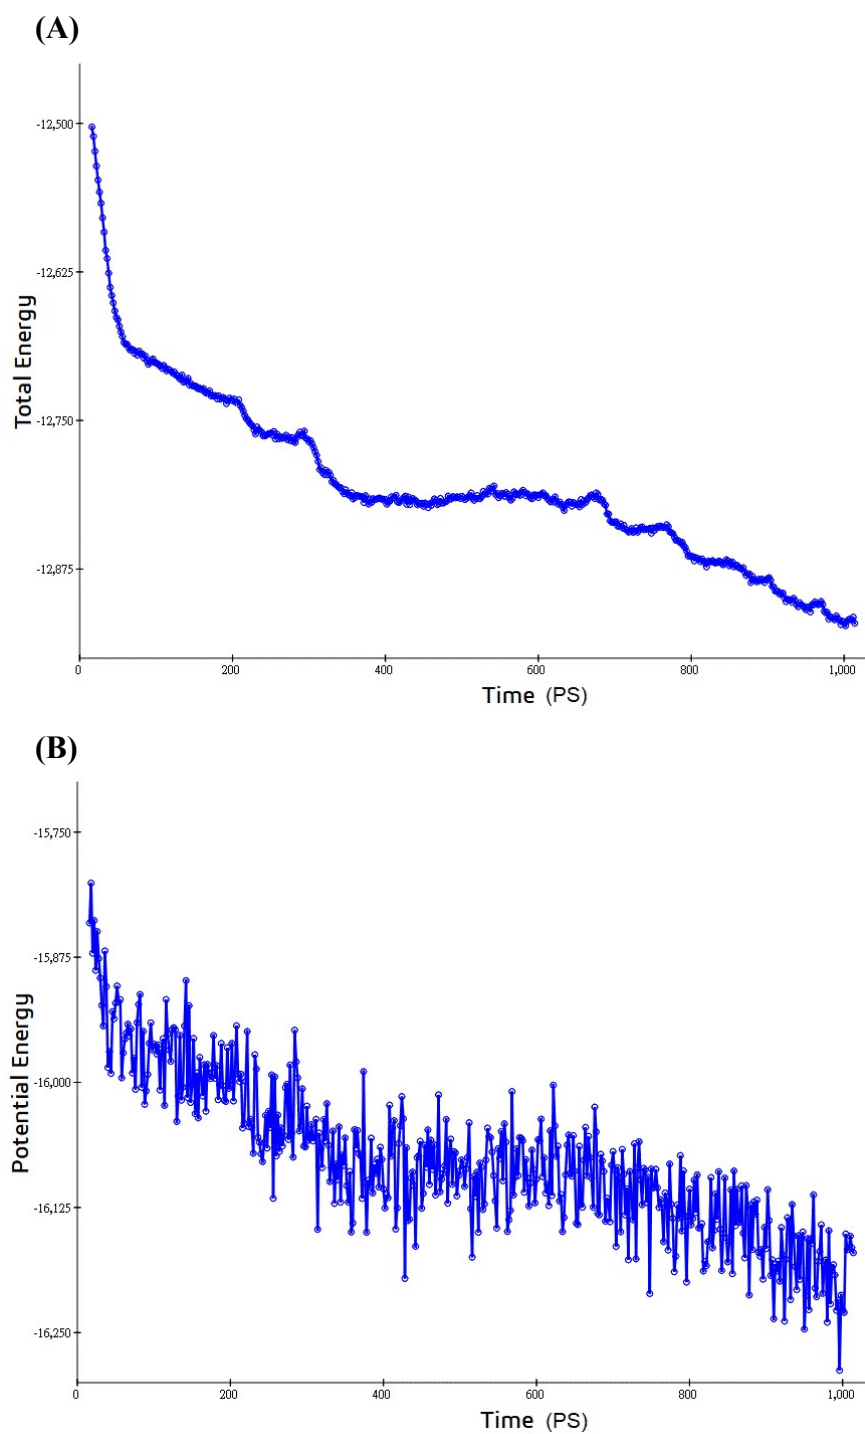

**Figure S8. The molecular dynamics simulations of hMAGL-NP-6 complex.**

(A) The total energy as a function of time. (B) The potential energy as a function of time.

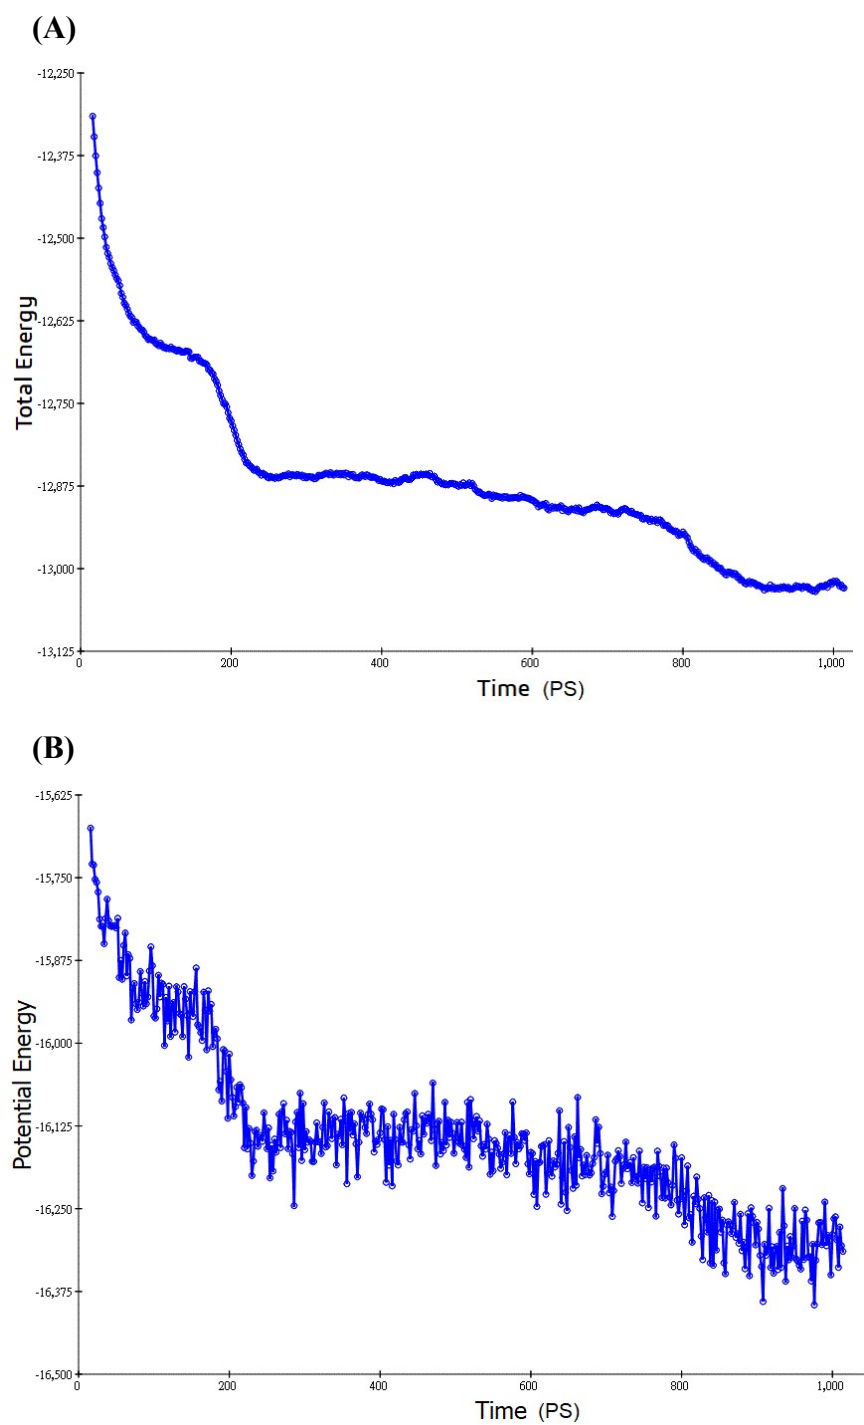

**Figure S9. The molecular dynamics simulations of hMAGL-NP-7 complex.**

(A) The total energy as a function of time. (B) The potential energy as a function of time.

**Table S1. The result of protein-ligand interaction profiler of hMAGL-NP2 analyzing by PLIP web tool.**

▼ Hydrophobic Interactions ----

| Index | Residue | AA  | Distance | Ligand Atom | Protein Atom |
|-------|---------|-----|----------|-------------|--------------|
| 1     | 51A     | ALA | 3.83     | 4373        | 530          |
| 2     | 179A    | ILE | 3.27     | 4365        | 2476         |
| 3     | 179A    | ILE | 3.72     | 4358        | 2473         |
| 4     | 205A    | LEU | 3.42     | 4360        | 2864         |
| 5     | 241A    | LEU | 3.99     | 4373        | 3454         |

▼ Hydrogen Bonds —

| Index | Residue | AA  | Distance<br>H-A | Distance<br>D-A | Donor<br>Angle | Protein<br>donor? | Side<br>chain | Donor<br>Atom | Acceptor<br>Atom |
|-------|---------|-----|-----------------|-----------------|----------------|-------------------|---------------|---------------|------------------|
| 1     | 51A     | ALA | 2.43            | 3.20            | 134.01         | ✓                 | ×             | 526<br>[Nam]  | 4376 [O2]        |
| 2     | 122A    | SER | 1.80            | 2.56            | 134.73         | ×                 | ✓             | 4375<br>[O2]  | 1631 [O3]        |
| 3     | 122A    | SER | 1.80            | 2.66            | 150.00         | ×                 | ✓             | 4376<br>[O2]  | 1631 [O3]        |
| 4     | 123A    | MET | 3.01            | 4.00            | 167.76         | ✓                 | ×             | 1635<br>[Nam] | 4376 [O2]        |
| 5     | 177A    | GLY | 2.29            | 3.14            | 147.96         | ×                 | ×             | 4380<br>[O2]  | 2448 [O2]        |
| 6     | 179A    | ILE | 2.33            | 3.27            | 155.54         | ✓                 | ×             | 2463<br>[Nam] | 4377 [O2]        |
| 7     | 194A    | TYR | 2.34            | 2.89            | 116.08         | ✓                 | ✓             | 2715<br>[O3]  | 4374 [O2]        |
| 8     | 205A    | LEU | 2.84            | 3.65            | 139.05         | ✓                 | ×             | 2860<br>[Nam] | 4380 [O2]        |

**Table S2. The result of protein-ligand interaction profiler of hMAGL-NP5 analyzing by PLIP web tool.**

▼ Hydrophobic Interactions .....

| Index | Residue | AA  | Distance | Ligand Atom | Protein Atom |
|-------|---------|-----|----------|-------------|--------------|
| 1     | 148A    | LEU | 3.02     | 4383        | 2000         |
| 2     | 176A    | LEU | 3.34     | 4372        | 2427         |
| 3     | 179A    | ILE | 3.10     | 4380        | 2469         |
| 4     | 179A    | ILE | 3.79     | 4367        | 2476         |
| 5     | 205A    | LEU | 3.33     | 4369        | 2873         |
| 6     | 241A    | LEU | 3.28     | 4383        | 3454         |

▼ Hydrogen Bonds —

| Index | Residue | AA  | Distance<br>H-A | Distance<br>D-A | Donor<br>Angle | Protein<br>donor? | Side<br>chain | Donor<br>Atom | Acceptor<br>Atom |
|-------|---------|-----|-----------------|-----------------|----------------|-------------------|---------------|---------------|------------------|
| 1     | 51A     | ALA | 2.77            | 3.30            | 113.34         | ✓                 | ✗             | 526<br>[Nam]  | 4387<br>[O2]     |
| 2     | 122A    | SER | 0.99            | 2.12            | 143.32         | ✗                 | ✓             | 4388<br>[O2]  | 1631<br>[O3]     |
| 3     | 122A    | SER | 2.19            | 3.22            | 139.63         | ✗                 | ✓             | 4387<br>[O2]  | 1631<br>[O3]     |
| 4     | 179A    | ILE | 2.02            | 2.99            | 163.34         | ✓                 | ✗             | 2463<br>[Nam] | 4370<br>[O3]     |



**Table S3. The result of protein-ligand interaction profiler of hMAGL-NP3 analyzing by PLIP web tool.**

▼ Hydrophobic Interactions .....

| Index | Residue | AA  | Distance | Ligand Atom | Protein Atom |
|-------|---------|-----|----------|-------------|--------------|
| 1     | 51A     | ALA | 3.65     | 4370        | 530          |
| 2     | 123A    | MET | 3.98     | 4370        | 1639         |
| 3     | 148A    | LEU | 3.94     | 4368        | 2000         |
| 4     | 179A    | ILE | 3.42     | 4365        | 2469         |
| 5     | 213A    | LEU | 3.65     | 4368        | 3000         |
| 6     | 213A    | LEU | 3.90     | 4370        | 3004         |
| 7     | 241A    | LEU | 3.56     | 4373        | 3458         |

▼ Hydrogen Bonds —

| Index | Residue | AA  | Distance<br>H-A | Distance<br>D-A | Donor<br>Angle | Protein<br>donor? | Side<br>chain | Donor<br>Atom | Acceptor<br>Atom |
|-------|---------|-----|-----------------|-----------------|----------------|-------------------|---------------|---------------|------------------|
| 1     | 51A     | ALA | 1.86            | 2.83            | 163.68         | ✓                 | ✗             | 526<br>[Nam]  | 4375 [O2]        |
| 2     | 122A    | SER | 1.76            | 2.61            | 147.91         | ✗                 | ✓             | 4375<br>[O2]  | 1631 [O3]        |
| 3     | 123A    | MET | 2.02            | 2.88            | 142.84         | ✓                 | ✗             | 1635<br>[Nam] | 4375 [O2]        |
| 4     | 152A    | ASN | 1.98            | 2.96            | 165.02         | ✓                 | ✗             | 2051<br>[Nam] | 4376 [O2]        |
| 5     | 155A    | SER | 1.94            | 2.86            | 160.74         | ✗                 | ✓             | 4376<br>[O2]  | 2101 [O3]        |

**Table S4. The result of protein-ligand interaction profiler of hMAGL-NP1 analyzing by PLIP web tool.**

▼ Hydrophobic Interactions .....

| Index | Residue | AA  | Distance | Ligand Atom | Protein Atom |
|-------|---------|-----|----------|-------------|--------------|
| 1     | 148A    | LEU | 3.82     | 4335        | 1996         |
| 2     | 184A    | LEU | 3.90     | 4362        | 2545         |
| 3     | 205A    | LEU | 2.86     | 4353        | 2873         |
| 4     | 213A    | LEU | 3.35     | 4342        | 3000         |
| 5     | 241A    | LEU | 2.90     | 4335        | 3425         |
| 6     | 241A    | LEU | 3.56     | 4340        | 3434         |
| 7     | 241A    | LEU | 3.98     | 4338        | 3430         |

▼ Hydrogen Bonds —

| Index | Residue | AA  | Distance<br>H-A | Distance<br>D-A | Donor<br>Angle | Protein<br>donor? | Side<br>chain | Donor<br>Atom | Acceptor<br>Atom |
|-------|---------|-----|-----------------|-----------------|----------------|-------------------|---------------|---------------|------------------|
| 1     | 152A    | ASN | 3.28            | 4.07            | 137.50         | ✓                 | ×             | 2051<br>[Nam] | 4349<br>[O2]     |
| 2     | 241A    | LEU | 3.01            | 3.71            | 116.69         | ×                 | ×             | 4349<br>[O2]  | 3421<br>[N3]     |
| 3     | 269A    | HIS | 2.19            | 2.99            | 127.24         | ×                 | ✓             | 4348<br>[O2]  | 3879<br>[Nar]    |

**Table S5. The result of protein-ligand interaction profiler of hMAGL-NP4 analyzing by PLIP web tool.**

▼ Hydrophobic Interactions .....

| Index | Residue | AA  | Distance | Ligand Atom | Protein Atom |
|-------|---------|-----|----------|-------------|--------------|
| 1     | 51A     | ALA | 3.97     | 4374        | 530          |
| 2     | 213A    | LEU | 3.97     | 4371        | 3000         |
| 3     | 241A    | LEU | 3.98     | 4370        | 3449         |

▼ Hydrogen Bonds —

| Index | Residue | AA  | Distance<br>H-A | Distance<br>D-A | Donor<br>Angle | Protein<br>donor? | Side<br>chain | Donor<br>Atom | Acceptor<br>Atom |
|-------|---------|-----|-----------------|-----------------|----------------|-------------------|---------------|---------------|------------------|
| 1     | 51A     | ALA | 2.74            | 3.53            | 136.51         | ✓                 | ✗             | 526<br>[Nam]  | 4378 [O2]        |
| 2     | 122A    | SER | 3.43            | 3.74            | 101.68         | ✓                 | ✓             | 1631<br>[O3]  | 4377 [O2]        |
| 3     | 122A    | SER | 3.27            | 3.74            | 109.32         | ✗                 | ✓             | 4377<br>[O2]  | 1631 [O3]        |
| 4     | 122A    | SER | 1.69            | 2.50            | 139.40         | ✗                 | ✓             | 4378<br>[O2]  | 1631 [O3]        |
| 5     | 152A    | ASN | 2.36            | 3.17            | 137.79         | ✓                 | ✓             | 2060<br>[Nam] | 4375 [O2]        |
| 6     | 155A    | SER | 1.48            | 2.14            | 113.64         | ✗                 | ✓             | 4375<br>[O2]  | 2101 [O3]        |



**Table S6. The result of protein-ligand interaction profiler of hMAGL-NP7 analyzing by PLIP web tool.**

▼ Hydrophobic Interactions .....

| Index | Residue | AA  | Distance | Ligand Atom | Protein Atom |
|-------|---------|-----|----------|-------------|--------------|
| 1     | 51A     | ALA | 3.95     | 4358        | 530          |
| 2     | 151A    | ALA | 3.66     | 4377        | 2045         |
| 3     | 176A    | LEU | 3.37     | 4379        | 2427         |
| 4     | 205A    | LEU | 3.43     | 4368        | 2873         |
| 5     | 213A    | LEU | 3.68     | 4362        | 3000         |
| 6     | 241A    | LEU | 3.90     | 4377        | 3449         |
| 7     | 241A    | LEU | 3.90     | 4359        | 3454         |

**Table S7. The result of protein-ligand interaction profiler of hMAGL-NP6 analyzing by PLIP web tool.**

▼ Hydrophobic Interactions .....

| Index | Residue | AA  | Distance | Ligand Atom | Protein Atom |
|-------|---------|-----|----------|-------------|--------------|
| 1     | 148A    | LEU | 3.73     | 2184        | 1013         |
| 2     | 176A    | LEU | 3.82     | 2183        | 1217         |
| 3     | 179A    | ILE | 3.33     | 2175        | 1238         |
| 4     | 205A    | LEU | 3.92     | 2175        | 1435         |
| 5     | 213A    | LEU | 3.92     | 2184        | 1497         |
| 6     | 241A    | LEU | 3.88     | 2172        | 1716         |
